# Supplementary material for: Packaged Foods Labeled as Organic Have a More Healthful Profile Than Their Conventional Counterparts, According to Analysis of Products Sold in the U.S. in 2019–2020
Source: Nutrients. 2021 Aug 29;13(9):3020. doi: 10.3390/nu13093020 (PMC8469099; doi:10.3390/nu13093020)
Supplement: Supplementary file 1 [file nutrients-13-03020-s001.zip › nutrients-1328023-supplementary.pdf]

Supplementary Table

**Table S1.** Ingredients classified as ultra-processed and their cosmetic additive status. Functional groups of ingredients that are classified as cosmetic additives are marked with an asterisk \*.

| Ultra-Processed Ingredient Function | Ingredient                                          |
|-------------------------------------|-----------------------------------------------------|
| <b>Anti-foaming*</b>                | Dimethyl Polysiloxane                               |
|                                     | Fatty Acids                                         |
|                                     | Fumed Silica                                        |
|                                     | Silica Gel                                          |
|                                     | Silicon Dioxide                                     |
| <b>Anticaking Agent</b>             | Aluminum Silicate                                   |
|                                     | Calcium Aluminosilicate                             |
|                                     | Calcium Silicate                                    |
|                                     | Powdered Cellulose (To Prevent Caking)              |
|                                     | Rice Concentrate                                    |
|                                     | Sodium Aluminosilicate                              |
|                                     | Sodium Ferrocyanide                                 |
| <b>Bulking Agent*</b>               | Talc Or Magnesium Silicate (553, 553B)              |
|                                     | Cellulose & Associated Derivatives                  |
|                                     | Chicory Root & Associated Derivatives               |
|                                     | Cottonseed Fiber                                    |
|                                     | Fructan                                             |
|                                     | Galactooligosaccharides (Gos) (A Type of Prebiotic) |
|                                     | Hydroxypropyl Methylcellulose                       |
|                                     | Inulin                                              |
|                                     | Isomalto-Oligosaccharides                           |
|                                     | Methylcellulose                                     |
|                                     | Oligofructose                                       |
|                                     | Oligosaccharides                                    |
|                                     | Short-Chain Fructooligosaccharides                  |
|                                     | Sodium Carboxymethylcellulose                       |
|                                     | Soy Bran                                            |
|                                     | Soybean Fiber                                       |
|                                     | Xylo-Oligosaccharides                               |
| <b>Color Stabilizer</b>             | Aluminum Ammonium Sulfate                           |
|                                     | Calcium Disodium EDTA                               |
|                                     | Carbon Monoxide                                     |
|                                     | Citric Acid                                         |
|                                     | Disodium Dihydrogen Pyrophosphate (To Retain Color) |
|                                     | Disodium EDTA (To Promote Color Retention)          |

EDTA  
Erythorbic Acid (To Promote Color Retention)  
Ethoxyquin To Preserve Color  
Ferrous Gluconate (To Stabilize Color)  
Filtered Wood Smoke (To Promote Color Retention)  
Magnesium Carbonates  
Magnesium Hydroxide  
Malic Acid (To Promote Color)  
Potassium Metabisulfite (To Protect Color)  
Potassium Nitrate  
Sodium Nitrate  
Sodium Nitrite  
Sodium Sulfate  
Tasteless Smoke  
Zinc Chloride (Color Stabilization)

---

**Color\***

Alkalized Cocoa (Color)  
Annatto & Annatto Derivatives  
Anthocyanin  
Apo Carotenal (Color)  
Apple & Associated Derivatives (Color)  
Artificial Colors (All Varieties)  
Astaxanthin  
Beet & Associated Derivatives (Color)  
Berry Color  
Beta-Carotene  
Blackcurrant & Associated Derivatives (Color)  
Blue 1 & Blue 1 Lake  
Blue 2 Lake  
Blueberry & Associated Derivatives (Color)  
Cabbage & Associated Derivatives (Color)  
Canthaxanthin  
Caramel & Associated Derivatives (Color)  
Carmine (Color)  
Carotenes (160, 160A, 160E, 160F)  
Carrot & Associated Derivatives (Color)  
Cherry Juice & Concentrate (Color)  
Chlorophyll And Chlorophyllins  
Chlorophyll Copper Complex  
Chokeberry Juice & Concentrate (Color)  
Cochineal, Carmine, And Carminic Acid  
Color  
Colour (E150C)

Copper Chlorophyllin (Color)  
Cranberry Powder (Color)  
Egg Shade  
Elderberry & Associated Derivatives (Color)  
FD&C Blue #2  
FD&C Green #3  
FD&C Red  
FD&C Red #3 Lake  
FD&C Red #4  
FD&C Red #40 Aluminum Lake  
FD&C Red No. 4 Lake  
Ferrous Gluconate  
Fruit & Vegetable Derivatives (Color)  
Grape & Associated Derivatives (Color)  
Hibiscus Derivatives (Color)  
Huito & Huito Juice Concentrate (Color)  
Iron Oxide  
Lycopene  
Malt  
Mica  
Natural Colors (All Varieties)  
Oleoresin Capsicum  
Orange 4  
Paprika & Associated Derivatives (Color)  
Plum Juice Concentrate (Color)  
Pomegranate Extract  
Pumpkin Derivatives (Color)  
Purple Sweet Potato & Associated Derivatives (Color)  
Radish & Associated Derivatives (Color)  
Red 3 Lake  
Red 40  
Red 43 Lake  
Red Bell Pepper Powder (Color)  
Red Cabbage & Associated Derivatives (Color)  
Red Currant Powder (Color)  
Riboflavin (Color)  
Rice Starch (Color)  
Saffron (Color)  
Spice And Color  
Spinach Derivatives (Color)  
Spirulina & Associated Derivatives (Color)  
Suma Root

Titanium Dioxide (Color)  
 Tomato & Associated Derivatives (Color)  
 Turmeric & Associated Derivatives (Color)  
 Vegetable & Associated Derivatives (Color)  
 Vitamin A Palmitate (Color)  
 Watermelon Juice Concentrate (Color)  
 Yellow #5 & #6 And #5 & #6 Lake  
 Zinc Oxide

---

**Emulsifier\***

Acetic & Fatty Acid Esters of Glycerol (472, 472A)  
 Ammonium Salts of Phosphatidic Acid  
 Calcium Stearoyl Lactylate  
 Citrus Pulp (Dried)  
 Cyclodextrin  
 Diacetyltartaric & Fatty Acid Esters of Glycerol (472E)  
 Diglycerides  
 Disodium Orthophosphate (339(II))  
 Disodium Phosphate  
 Esters Of Fatty Acids  
 Glycerin Or Glycerol  
 Glycerol Esters of Wood Rosins  
 Glycerol Monostearate  
 Glyceryl Monostearate  
 Lactic & Fatty Acid Esters of Glycerol (472B)  
 Lactic Acid Esters of Mono and Diglycerides of Fatty Acids  
 Lecithin  
 Mono And Diglycerides of Fatty Acids  
 Monoglycerides  
 Oleyl Lactylic Acid  
 Orange Pulp (Dried)  
 Plant Mono and Diglycerides  
 Polyethylene Glycol  
 Polyglycerol Esters of Fatty Acids  
 Polyglycerol Polyricinoleate  
 Polyoxyethylene Mono and Diglycerides of Fatty Acids  
 Polysorbate 20, 60, 65, and 80  
 Propylene Glycol Esters of Fatty Acids  
 Propylene Glycol Mono and Diesters of Fatty Acids  
 Propylene Glycol Monoester  
 Propylene Glycol Monostearate  
 Rapeseed  
 Sodium Caseinate  
 Sodium Lauryl Sulfate

---

Sodium Stearoyl Lactylate  
Sorbitan Monolaurate  
Sorbitan Monostearate  
Sorbitan Tristearate  
Stearoyl Lactylate  
Steroyl Lactylic Acid (Sla)  
Sucrose Acetate Isobutyrate  
Sucrose Esters of Fatty Acids  
Sunflower Lecithin  
Tetrapotassium Diphosphate (450(V))  
Triethyl Citrate

---

**Fermented and Distilled Alcohol**

Alcohol  
Amaretto  
Bourbon  
Brandy  
Cognac  
Frangelico  
Gin  
Irish Cream Liqueur  
Liqueur  
Liquor  
Port  
Rum  
Tequila  
Vodka  
Whiskey

---

**Firming Agent**

Alum  
Aluminum Potassium Sulfate  
Aluminum Sulfate  
Calcium Hydroxide  
Magnesium Chloride

---

**Flavor Enhancer\***

Amino Acids  
Dipotassium Guanylate  
Disodium 5'-Ribonucleotides  
Disodium Guanosine 5'-Monophosphate  
Disodium Guanylate  
Disodium Inosinate  
Erythorbic Acid  
Glutamates  
Glutamic Acid  
Glycine  
Hydrolyzed Proteins (All Varieties)

---

Hydrolyzed Wheat  
Inosinic Acid  
L-Glutamic Acid  
Magnesium Sulfate  
Monosodium Glutamate (MSG)  
Nucleotides  
Potassium Sulfates  
Ribonucleotides  
Sodium Ribonucleotides for Flavor

---

**Flavor\***

Adipic Acid  
Aldehydes  
Anchovy Flavor  
Apple Flavor  
Aqueous Natural Smoke  
Artificial Flavors (All Varieties)  
Autolyzed Yeast Extract  
Avocado Flavor  
Bacon Flavor  
Baileys Flavoring (Milk)  
Banana Flavor  
Barbeque Flavor  
Basil Flavor  
Beef Flavor  
Benzaldehyde  
Benzyl Alcohol  
Blueberry Flavor  
Burnt Sugar Flavor  
Butter Acids  
Butter Esters  
Butter Flavor  
Buttermilk Flavor  
Butyric Acid  
Caffeine  
Cake Flavor  
Caramel Flavor  
Cassava Extract  
Chai Flavor  
Cheese Flavor  
Cherry Flavor  
Chicken Flavor  
Chicken Stock (Flavored)  
Chili Flavor

Cinnamic Aldehyde  
Cinnamon Flavor  
Coconut Flavor  
Coffee Flavor  
Cookie Dough Flavor  
Cookie Flavor  
Creme De Menthe Flavor  
Diacetyl  
Dill Flavor  
Disodium Succinate  
Dragon Fruit Flavor  
Elderberry Flavor  
Essence (All Varieties)  
Ethyl Maltol  
Ethylvanillin  
Flavor  
Formic Acid  
Fragrance & Natural Fragrance  
French Toast Flavor  
Fried Flavor  
Garlic Flavor  
Ginger Flavor  
Glutamine  
Glyceryl Triacetate  
Graham Cracker Flavor  
Grape Flavor  
Green Chili Flavor  
Grill Flavor  
Hibiscus Flavor  
Honey Flavor  
Hot Sauce Flavor  
Hydrolyzed Corn  
Hydrolyzed Corn Gluten  
Imitation Almond Extract  
Isopropanol  
Jalapeno Flavor  
Lavender Flavor  
Lemon Flavor  
Lime Flavor  
Limonene  
Liquid Smoke  
Malt Flavor

Maltol  
Mango Flavor  
Maple Flavor  
Meaty Flavor  
Menthol  
Milk Flavor  
Mint Flavor  
Mojito Flavor  
Mushroom Flavor  
Natural & Artificial Flavor (All Varieties)  
Natural Flavor (All Varieties)  
Nut Flavor  
Onion Flavor  
Orange Flavor  
Oyster Flavor  
Pandan Flavoring  
Peach Flavor  
Pecan Flavor  
Pepper Flavor  
Peppermint Flavor  
Pineapple Flavor  
Pistachio Flavor  
Pomegranate Flavor  
Pork Broth with Natural Flavorings  
Pork Flavor  
Potassium Acetate  
Poultry Flavor  
Pumpkin Spice Flavor  
Quillaia Extract  
Quillaja  
Raspberry Flavor  
Roast Flavor  
Rye Flavor  
Saponaria Extract  
Scallop Flavor  
Sherry Wine Flavor  
Smoke Flavor  
Sodium Acetate  
Sour Cream Flavor (Non Dairy)  
Soy Sauce Flavor  
Spearmint Flavor  
Spice Flavor

|                          |                                      |
|--------------------------|--------------------------------------|
|                          | Spinach Flavoring                    |
|                          | Starter Distillate                   |
|                          | Stearic Acid                         |
|                          | Strawberry Flavor                    |
|                          | Tannic Acid                          |
|                          | Tomato Flavor                        |
|                          | Tropical Flavors                     |
|                          | Truffle Flavor                       |
|                          | Turkey Flavor                        |
|                          | Vanilla Flavor                       |
|                          | Vanillin                             |
|                          | Vegan Flavoring                      |
|                          | Vegetarian Flavor                    |
|                          | Wasabi Flavor                        |
|                          | Wildberry Flavor                     |
|                          | Yeast Extract                        |
|                          | Yogurt Flavor                        |
| <b>Gelling Agent*</b>    | Gelatin                              |
| <b>Glazing Agent*</b>    | Beeswax, White and Yellow            |
|                          | Carnauba Wax                         |
|                          | Confectioner's Glaze                 |
|                          | Confectionery Coating                |
|                          | Paraffin Wax (905C)                  |
|                          | Plant Resin                          |
|                          | Shellac                              |
|                          | Wax                                  |
| <b>Humectant</b>         | Citrus Fiber                         |
|                          | Citrus Flour                         |
|                          | Humectant                            |
|                          | Propylene Glycol                     |
| <b>Rare Culinary Use</b> | 100% Muscadine Juice Reconstituted   |
|                          | Almond Protein                       |
|                          | Apple Juice Concentrate              |
|                          | Banana Juice Concentrate             |
|                          | Barley Gluten                        |
|                          | Barley Malt                          |
|                          | Barley Malt Extract & Extract Powder |
|                          | Buttermilk Powder                    |
|                          | Buttermilk Solids                    |
|                          | Calcium-Sodium Caseinate             |
|                          | Casein                               |
|                          | Cassava Syrup                        |

Cheese Curds  
Chia Protein Powder (Salvia Hispanica)  
Collagen  
Corn Gluten  
Corn Sugar  
Corn Sweeteners  
Corn Syrup  
Corn Syrup Solids  
Crystalline Fructose  
Cultured Non-Fat Milk Solids  
Cultured Whey & Associated Derivatives  
Dairy Solids  
Date Juice Concentrate  
Date Powder  
Date Sugar  
Date Syrup  
Dextrose  
Dried Buttermilk  
Dried Honey  
Dried Milk (Fat Free)  
Edible Collagen Casings  
Emulsified Vegetable Shortening  
Extract Of Malted Barley and Corn  
Faba Bean Protein  
Fructose  
Fructose Powder  
Fructose Solids  
Fruit Syrup  
Fully Hydrogenated Oils (All Varieties)  
Gelatin Hydrolysate  
Glucose - Fructose Syrup  
Glucose & Associated Derivatives  
Golden Syrup  
Guanabana Juice  
Hemp Protein & Hemp Protein Concentrate  
Hi-Maltose Corn Syrup  
High Fructose Corn Syrup  
Honey Crystals  
Honey Powder  
Honey Solids  
Hydrogenated Animal Fats and Oils  
Hydrogenated Lard

Hydrogenated Oils (All Varieties)  
Hydrogenated Palm Stearin  
Hydrogenated Tallow  
Hydrogenated Vegetable Fat  
Hydrogenated Vegetable Shortening (Soy)  
Hydrolyzed Collagen  
Interesterified Oils (All Varieties)  
Invert Sugar & Invert Sugar Syrup  
Kiwifruit Juice Concentrate  
Lactose  
Malt & Associated Derivatives  
Maltodextrin  
Maltose  
Maltose Syrup  
Maltrin  
Mandarin Juice Concentrate  
Mango Juice Concentrate  
Maqui Berry Juice Concentrate  
Margarine (Baker's)  
Micellar Casein  
Milk (Fat Free) (Dried)  
Milk Concentrate  
Milk Powder  
Milk Protein Concentrate  
Milk Protein Isolate  
Milk Solids  
Milk Sugars  
Mulberry Juice  
Mycoprotein  
Nonfat Dry Milk  
Oat Extract  
Oat Isolate  
Oat Syrup Solids  
Orange Juice Concentrate  
Partially Hydrogenated Oils  
Partially Hydrogenated Vegetable Fat  
Passionfruit Juice Concentrate  
Pea Flour  
Pea Powder  
Pea Protein & Pea Protein Concentrate  
Pea Protein Isolate  
Peach Juice Concentrate

Pear Juice Concentrate  
Pineapple Concentrate Powder  
Pineapple Juice Concentrate  
Pineapple Syrup  
Plum Juice Concentrate  
Pomegranate Juice Concentrate  
Potassium Caseinate  
Potato Protein  
Protein Isolate  
Prune Juice Concentrate  
Raisin Juice Concentrate  
Raspberry Juice Concentrate  
Rbst-Free Dry Milk  
Refined, Deodorized, Partially Hydrogenated, Fractionated Palm Oil  
Rennet Casein  
Rice Malt  
Rice Protein  
Rice Syrup  
Shortening & Shortening Powder  
Soluble Raisin Solids  
Sorghum Syrup  
Soy Bean Milk Powder  
Soy Concentrate  
Soy Flour  
Soy Grits  
Soy Isolate  
Soy Meal  
Soy Nuggets  
Soy Protein & Soy Protein Isolate  
Soy Pulp  
Soybean Flakes  
Soybean Powder  
Sprouted Rice Protein  
Starch Syrup  
Strawberry Juice Concentrate  
Syrup  
Tangerine Juice Concentrate  
Tapioca Syrup  
Tapioca Syrup Solids  
Textured Soy Protein  
Textured Vegetable Protein  
Vegetable Protein

Vegetable Shortening  
Vegetable Shortening (Interesterified and Hydrogenated Soybean Oils)  
Wheat Gluten  
Wheat Isolate  
Wheat Protein & Wheat Protein Isolate  
Wheat Syrup  
Whey & Associated Derivatives  
Whole Milk Powder (Rbst Free)  
Xylose  
Yacon Syrup

---

**Sequestrant**

Tetrasodium Pyrophosphate  
Dipotassium Acid Phosphate  
Dipotassium Phosphate  
Disodium Dihydrogen Pyrophosphate  
Disodium Pyrophosphate  
Glucono Delta-Lactone  
Monosodium Phosphate  
Potassium Phosphates  
Sodium Acid Pyrophosphate  
Sodium And Potassium Triphosphates  
Sodium Gluconate  
Sodium Hexametaphosphate  
Sodium Phosphate  
Sodium Polyphosphates  
Sodium Pyrophosphates  
Sodium Triphosphate (To Retain Moisture)  
Sodium Tripolyphosphate  
Tripotassium Phosphate  
Trisodium Phosphate

---

**Sweetener\***

Acesulphame Potassium  
Allulose  
Aspartame  
Enzymatically Modified Stevia Glucosyl  
Erythritol  
Hydrogenated Starch Hydrolysate  
Isomalt  
Isomaltulose  
Lactitol  
Lactitol Monohydrate  
Maltitol  
Maltitol Syrup  
Mannitol

---

**Monk Fruit & Associated Derivatives**

Neotame

Polyglycitol Syrup

Rebaudioside-A (Stevia Leaf Extract)

Saccharins

Sorbitol

Sorbitol Syrup

Stevia Extract

Steviol Glycosides (Stevia)

Sucralose

Tagatose

Trehalose

Xylitol

---

**Thickener\***

Acacia Extract

Acacia Or Gum Arabic

Acetylated Distarch Adipate (Maize)

Acetylated Distarch Phosphate (Potato)

Agar

Alginic Acid

Ammonium Alginate

Arrowroot Flour

Beta-Cyclodextrine

Beta-Glucan Concentrate

Calcium Alginate

Calcium Carrageenan

Calcium Caseinate

Calcium Stearate

Carbohydrate Gums

Carob Flour

Carrageenan

Chicle

Citrus Pectin

Corn Binder

Corn Fiber

Corn Products

Corn Starch

Dextrin

Dioctyl Sodium Sulphosuccinate

Distarch Phosphate

Ethyl Methyl Cellulose

Gellan Gum

Glucomannan (II)

Guar Gum  
Gum Base  
Hydroxypropyl Cellulose  
Hydroxypropyl Distarch Phosphate  
Karaya Gum  
Konjac Flour  
Konjac Or Konjac Gum  
Locust Bean or Carob Bean Gum  
Modified Starch (All Varieties)  
Oat Bran  
Oat Concentrate  
Oat Powder  
Pectin (440, 440A, 440B)  
Polydextrose  
Potato Dextrin  
Potato Flour  
Propylene Glycol Alginate  
Psyllium Extract  
Psyllium Fiber  
Psyllium Husk Powder  
Resistant Dextrin  
Resistant Maltodextrin  
Resistant Starch  
Seaweed Extract  
Seaweed Powder  
Sodium Alginate  
Soluble Corn Fiber  
Soluble Fiber  
Soluble Tapioca Fiber  
Starch Sodium Octenyl Succinate  
Sugar Beet Fiber  
Sweet Potato Flour  
Tamarind Seed Gum  
Tapioca Dextrin  
Tara Gum  
Tragacanth Gum  
Whole Algal Flour  
Xanthan Gum  
Yam Flour

---

**Table S2.** Ingredients classified as containing trans-fat.

| <b>Ingredient</b>                                |
|--------------------------------------------------|
| Canola Oil                                       |
| Cottonseed Oil                                   |
| Diacetyltartaric & Fatty Acid Esters of Glycerol |
| Diglycerides                                     |
| Distilled Monoglycerides                         |
| Esters Of Fatty Acids                            |
| Fatty Acids                                      |
| Fractionated Palm Oil                            |
| Fully Hydrogenated Oils (all varieties)          |
| Hydrogenated Oils (all varieties)                |
| Hydrogenated Vegetable Shortening                |
| Interesterified Oils (all varieties)             |
| Lactic & Fatty Acid Esters of Glycerol           |
| Lecithin                                         |
| Margarine (Palm)                                 |
| Mono And Diglycerides of Fatty Acids             |
| Monoglycerides                                   |
| Oil Blend                                        |
| Palm Fat                                         |
| Palm Oil                                         |
| Partially Hydrogenated Oils (all varieties)      |
| Rapeseed Oil                                     |
| Shortening                                       |
| Shortening Powder                                |
| Soy Bean Oil                                     |
| Sucrose Esters of Fatty Acids                    |
| Vegetable Shortening (all varieties)             |

**Table S3.** Ingredient product count by aisle, category, and organic status.

| <b>Aisle</b>                          | <b>Category</b>                        | <b>Conventional<br/>(n =)</b> | <b>Organic<br/>(n=)</b> |
|---------------------------------------|----------------------------------------|-------------------------------|-------------------------|
| <b>Baby Food</b>                      | Baby Formula                           | 5                             | 1                       |
|                                       | Cereal Bars & Cereal Snacks for Babies | 1                             | 17                      |
|                                       | Cereal for Babies                      | 27                            | 14                      |
|                                       | Cookies for Babies                     | 4                             | 11                      |
|                                       | Crackers & Biscuits for Babies         | 6                             | 14                      |
|                                       | Fruit & Vegetable Snacks for Babies    | 11                            | 29                      |
|                                       | Juice & Drinks for Babies              | 23                            | 11                      |
|                                       | Meals for Babies                       | 36                            | 26                      |
|                                       | Meat Sticks for Babies                 | 1                             | 0                       |
|                                       | Other Baby Food                        | 11                            | 6                       |
|                                       | Puffs for Babies                       | 10                            | 46                      |
|                                       | Pureed Baby Food & Pouches             | 195                           | 525                     |
|                                       | Yogurt for Babies                      | 13                            | 7                       |
|                                       | Total                                  | 343                           | 707                     |
| <b>Bakery</b>                         | Brownies                               | 186                           | 1                       |
|                                       | Carrot Muffins                         | 3                             | 0                       |
|                                       | Cheese Muffins                         | 1                             | 0                       |
|                                       | Chocolate Chip Muffins                 | 43                            | 0                       |
|                                       | Chocolate Muffins                      | 18                            | 0                       |
|                                       | Other Savory Muffins                   | 17                            | 0                       |
|                                       | Other Sweet Muffins                    | 143                           | 0                       |
|                                       | Pumpkin Muffins                        | 10                            | 0                       |
|                                       | Zucchini Muffins                       | 1                             | 0                       |
|                                       | Total                                  | 422                           | 1                       |
| <b>Baking &amp; Dessert<br/>Mixes</b> | Biscuit Dough                          | 18                            | 0                       |
|                                       | Biscuit Mixes                          | 25                            | 1                       |
|                                       | Bread, Roll & Muffin Mixes             | 83                            | 2                       |
|                                       | Brownie & Dessert Mixes                | 108                           | 7                       |
|                                       | Cake Mixes                             | 191                           | 5                       |
|                                       | Cookie Doughs                          | 32                            | 0                       |
|                                       | Cookie Mixes                           | 127                           | 5                       |
|                                       | Cornbread Mix                          | 24                            | 0                       |
|                                       | Dumpling & Savory Pancake Mixes        | 10                            | 0                       |
|                                       | Muffin Mix                             | 63                            | 1                       |
|                                       | Other Baking Mixes                     | 24                            | 2                       |
|                                       | Other Dessert Mixes                    | 53                            | 3                       |
|                                       | Other Dough                            | 6                             | 0                       |
|                                       | Other Frozen Bread                     | 35                            | 0                       |
|                                       | Other Non-Dessert Baking Mixes         | 8                             | 1                       |

|                                   |                                    |     |    |
|-----------------------------------|------------------------------------|-----|----|
|                                   | Pastry Dough                       | 14  | 0  |
|                                   | Pie Dough                          | 13  | 0  |
|                                   | Pizza & Pie Crust Mixes            | 9   | 0  |
|                                   | Scone Mixes                        | 3   | 0  |
|                                   | Total                              | 846 | 27 |
| <b>Baking Decorations</b>         | Decorating Gels                    | 6   | 0  |
|                                   | Food Coloring                      | 5   | 0  |
|                                   | Frosting & Icing                   | 119 | 3  |
|                                   | Other Dessert Toppings             | 78  | 0  |
|                                   | Total                              | 208 | 3  |
| <b>Baking Ingredients</b>         | Baking Chocolate                   | 36  | 7  |
|                                   | Chocolate Chips                    | 96  | 20 |
|                                   | Cocoa                              | 1   | 0  |
|                                   | Mincemeat Pie Filling              | 2   | 0  |
|                                   | Pastry & Pie Crust Doughs & Shells | 4   | 0  |
|                                   | Pastry & Pie Fillings              | 129 | 8  |
|                                   | Corn Syrup                         | 22  | 0  |
|                                   | Molasses                           | 1   | 0  |
|                                   | Total                              | 291 | 35 |
| <b>BBQ &amp; Other Sauces</b>     | Asian Sauces                       | 2   | 0  |
|                                   | Other Ethnic Sauces                | 210 | 22 |
|                                   | Peanut Sauce                       | 12  | 2  |
|                                   | Sloppy Joe Sauce                   | 29  | 0  |
|                                   | Sweet & Sour Sauce                 | 21  | 0  |
|                                   | Teriyaki Sauce                     | 82  | 6  |
|                                   | Worcestershire Sauces              | 32  | 4  |
|                                   | Total                              | 388 | 34 |
| <b>Breads, Bagels &amp; Rolls</b> | Bagels                             | 158 | 12 |
|                                   | Baguettes & French Breads          | 66  | 4  |
|                                   | Breadsticks                        | 30  | 0  |
|                                   | Brioche                            | 58  | 0  |
|                                   | Challah                            | 4   | 0  |
|                                   | Ciabatta                           | 27  | 2  |
|                                   | English Muffins                    | 107 | 7  |
|                                   | Flatbreads                         | 37  | 2  |
|                                   | Focaccia                           | 3   | 0  |
|                                   | Hawaiian Rolls                     | 14  | 0  |
|                                   | Italian Breads                     | 59  | 2  |
|                                   | Multigrain Breads                  | 62  | 22 |
|                                   | Naan                               | 10  | 1  |
|                                   | Oatbran Breads                     | 31  | 6  |
|                                   | Other Breads                       | 234 | 34 |
|                                   | Other Wholegrain Bread             | 38  | 13 |

|                        |                                       |      |     |
|------------------------|---------------------------------------|------|-----|
|                        | Pita & Pocket Breads                  | 30   | 5   |
|                        | Potato Breads                         | 24   | 0   |
|                        | Pumpernickel                          | 7    | 0   |
|                        | Rye Bread                             | 49   | 1   |
|                        | Sourdough Breads                      | 73   | 5   |
|                        | Sweet Rolls                           | 27   | 0   |
|                        | Tortillas & Wraps                     | 59   | 6   |
|                        | Wheat Bread                           | 233  | 15  |
|                        | White Breads                          | 227  | 25  |
|                        | Pizza Dough                           | 15   | 3   |
|                        | Dinner Rolls                          | 70   | 0   |
|                        | Flax Breads & Buns                    | 2    | 0   |
|                        | Frozen Bread Loaves & Slices          | 22   | 0   |
|                        | Frozen Bread Rolls                    | 30   | 4   |
|                        | Frozen Dough                          | 0    | 1   |
|                        | Frozen Garlic Bread                   | 90   | 0   |
|                        | Frozen Muffins, Biscuits & Bagels     | 47   | 0   |
|                        | Garlic Bread                          | 20   | 2   |
|                        | Hamburger Buns                        | 250  | 13  |
|                        | Hot Dog Buns                          | 176  | 8   |
|                        | Raisin and Cinnamon Bread             | 46   | 2   |
|                        | Spelt Bread                           | 1    | 1   |
|                        | Sprouted Breads & Buns                | 25   | 46  |
|                        | Sweet Breads                          | 20   | 0   |
|                        | Taco Shells, Corn                     | 40   | 4   |
|                        | Taco Shells, Wheat                    | 1    | 0   |
|                        | Corn Tortillas                        | 64   | 6   |
|                        | Flour Tortillas                       | 159  | 15  |
|                        | Other Fruit Bread                     | 31   | 0   |
|                        | Total                                 | 2776 | 267 |
| <b>Breakfast Foods</b> | Biscuit Sandwiches                    | 14   | 0   |
|                        | Breakfast Bars                        | 56   | 0   |
|                        | Breakfast Burritos & Wraps            | 4    | 0   |
|                        | Breakfast Meals & Main Dishes         | 17   | 3   |
|                        | Breakfast Meals & Main Dishes, Medium | 4    | 0   |
|                        | Breakfast Meals & Main Dishes, Small  | 36   | 3   |
|                        | Croissant Sandwiches                  | 2    | 0   |
|                        | Flavored Crepes                       | 8    | 0   |
|                        | Flavored Pancakes                     | 4    | 0   |
|                        | Flavored Waffles                      | 5    | 3   |
|                        | Frozen Biscuit Sandwiches             | 62   | 0   |
|                        | Frozen Breakfast Burritos & Wraps     | 59   | 3   |
|                        | Frozen Breakfast Entrees & Meals      | 47   | 1   |

|                                              |                                                    |      |    |
|----------------------------------------------|----------------------------------------------------|------|----|
|                                              | Frozen Breakfast Main Dish (6 to 9.99 oz)          | 60   | 8  |
|                                              | Frozen Breakfast Meal ( $\geq 10$ oz)              | 7    | 0  |
|                                              | Frozen Breakfast Meals and Main Dishes ( $< 6$ oz) | 24   | 0  |
|                                              | Frozen Croissant Sandwiches                        | 12   | 0  |
|                                              | Frozen Flavored Crepes                             | 2    | 0  |
|                                              | Frozen Flavored French Toast                       | 18   | 0  |
|                                              | Frozen Flavored Pancakes                           | 55   | 2  |
|                                              | Frozen Flavored Waffles                            | 140  | 8  |
|                                              | Frozen Meatless Breakfast Entrees                  | 14   | 0  |
|                                              | Frozen Omelets                                     | 3    | 0  |
|                                              | Frozen Plain Crepes                                | 1    | 0  |
|                                              | Frozen Plain French Toast                          | 15   | 1  |
|                                              | Frozen Plain Pancakes                              | 13   | 3  |
|                                              | Frozen Plain Waffles                               | 81   | 10 |
|                                              | Hash Browns                                        | 51   | 0  |
|                                              | Omelets                                            | 5    | 0  |
|                                              | Other Breakfast Sandwiches                         | 10   | 0  |
|                                              | Other Frozen Breakfast Sandwiches                  | 83   | 0  |
|                                              | Pancake & Waffle Mixes                             | 202  | 14 |
|                                              | Plain French Toast                                 | 2    | 0  |
|                                              | Plain Pancakes                                     | 4    | 0  |
|                                              | Plain Waffles                                      | 2    | 1  |
|                                              | Maple Syrup                                        | 8    | 12 |
|                                              | Total                                              | 1130 | 72 |
| <b>Broths &amp; Other<br/>Cooking Sauces</b> | Cooking Wines                                      | 28   | 0  |
|                                              | Hollandaise                                        | 1    | 0  |
|                                              | Other Cooking Sauces                               | 145  | 4  |
|                                              | Red Clam Sauce                                     | 1    | 0  |
|                                              | Scampi Sauce                                       | 3    | 0  |
|                                              | Sherry                                             | 1    | 0  |
|                                              | Soy Sauce                                          | 100  | 24 |
|                                              | Stir Fry Sauce                                     | 40   | 2  |
|                                              | Vinegar                                            | 110  | 12 |
|                                              | White Clam Sauce                                   | 4    | 0  |
|                                              | Total                                              | 433  | 42 |
| <b>Cakes &amp; Pastries</b>                  | Apple Pie                                          | 49   | 0  |
|                                              | Blueberry Pies                                     | 10   | 0  |
|                                              | Cakes                                              | 537  | 0  |
|                                              | Carrot Cakes                                       | 18   | 0  |
|                                              | Cheesecake                                         | 123  | 2  |
|                                              | Cherry Pies                                        | 30   | 0  |
|                                              | Cinnamon Roll                                      | 32   | 0  |
|                                              | Coffee Cakes                                       | 34   | 0  |

|              |                              |      |     |
|--------------|------------------------------|------|-----|
|              | Creme Pies                   | 11   | 0   |
|              | Croissants                   | 46   | 0   |
|              | Cupcakes                     | 282  | 0   |
|              | Danishes                     | 76   | 0   |
|              | Donuts                       | 326  | 1   |
|              | Eclairs                      | 8    | 0   |
|              | Key Lime Pies                | 3    | 0   |
|              | Lemon Meringue Pies          | 6    | 0   |
|              | Marshmallow Rice Treats      | 114  | 2   |
|              | Other Cake Novelties         | 100  | 0   |
|              | Other Pastries               | 162  | 2   |
|              | Peach Pies                   | 10   | 0   |
|              | Pecan Pies                   | 20   | 0   |
|              | Pound Cake                   | 39   | 0   |
|              | Pumpkin Pies                 | 18   | 0   |
|              | Scones                       | 19   | 0   |
|              | Sponge Cake                  | 38   | 0   |
|              | Streusel                     | 7    | 0   |
|              | Toaster Pastries             | 280  | 2   |
|              | Tres Leche Cake              | 6    | 0   |
|              | Turnover                     | 2    | 0   |
|              | Upside Down Cake             | 2    | 0   |
|              | Angel Food Cake              | 7    | 0   |
|              | Frozen Cinnamon Rolls        | 13   | 0   |
|              | Total                        | 2428 | 9   |
| <b>Candy</b> | Assorted Candy Packs         | 27   | 1   |
|              | Assorted Chocolate           | 171  | 0   |
|              | Candied Apple                | 21   | 0   |
|              | Candy Bars                   | 161  | 4   |
|              | Caramels, Toffee & Fudge     | 77   | 6   |
|              | Chewy Candy                  | 568  | 22  |
|              | Chocolate Bars & Confection  | 1258 | 167 |
|              | Gumdrops                     | 28   | 0   |
|              | Hard Candy                   | 207  | 7   |
|              | Licorice & Twists            | 76   | 7   |
|              | Lollipops                    | 129  | 4   |
|              | Marshmallow Candies          | 84   | 0   |
|              | Marshmallow Creme & Fluff    | 9    | 0   |
|              | Marshmallows                 | 117  | 0   |
|              | Nougat & Marzipan            | 25   | 0   |
|              | Other Candy                  | 312  | 10  |
|              | Other Candy Barks & Brittles | 48   | 12  |
|              | Peanut Brittle               | 16   | 0   |

|                                           |                                           |      |     |
|-------------------------------------------|-------------------------------------------|------|-----|
|                                           | Peanut Butter Flavored Candy, Cups & Bars | 224  | 16  |
|                                           | Peppermint                                | 131  | 5   |
|                                           | Promotional & Seasonal Candy              | 877  | 6   |
|                                           | Soft & Gummy Candy                        | 644  | 18  |
|                                           | Sour & Tart Candy                         | 95   | 0   |
|                                           | Sugar Free Candy                          | 42   | 0   |
|                                           | Swedish Fish                              | 47   | 2   |
|                                           | Taffy                                     | 80   | 0   |
|                                           | Toffee                                    | 31   | 0   |
|                                           | Truffles                                  | 181  | 30  |
|                                           | Total                                     | 5686 | 317 |
| <b>Canned &amp;<br/>Prepared Beans</b>    | Baked Beans                               | 114  | 7   |
|                                           | Black Beans                               | 72   | 30  |
|                                           | Black-Eyed Beans                          | 19   | 0   |
|                                           | Butter Beans                              | 18   | 0   |
|                                           | Chili Beans                               | 61   | 6   |
|                                           | Garbanzo Beans                            | 45   | 23  |
|                                           | Great Northern Beans                      | 14   | 7   |
|                                           | Kidney Beans & Red Beans                  | 114  | 32  |
|                                           | Lima Beans                                | 11   | 0   |
|                                           | Mixed Beans                               | 6    | 10  |
|                                           | Navy Beans                                | 16   | 2   |
|                                           | Other Beans                               | 48   | 16  |
|                                           | Pinto Beans                               | 71   | 21  |
|                                           | Refried Beans                             | 107  | 24  |
|                                           | White Beans                               | 20   | 1   |
|                                           | Total                                     | 736  | 179 |
| <b>Canned &amp;<br/>Prepared Fruit</b>    | Apricots                                  | 17   | 0   |
|                                           | Berries                                   | 2    | 0   |
|                                           | Canned & Prepared Apples                  | 8    | 1   |
|                                           | Cherries                                  | 20   | 0   |
|                                           | Cranberry Sauce                           | 24   | 11  |
|                                           | Grapefruit                                | 5    | 0   |
|                                           | Mandarins & Oranges                       | 71   | 1   |
|                                           | Mixed Fruit Salad                         | 112  | 1   |
|                                           | Other Fruit                               | 24   | 6   |
|                                           | Parfait & Mixed Fruit Cups                | 76   | 3   |
|                                           | Peaches                                   | 162  | 14  |
|                                           | Pears                                     | 104  | 12  |
|                                           | Pineapple                                 | 152  | 8   |
|                                           | Total                                     | 777  | 57  |
| <b>Canned &amp;<br/>Prepared Tomatoes</b> | Chopped & Sliced Tomatoes                 | 12   | 0   |
|                                           | Crushed Tomatoes                          | 90   | 24  |

|                                                 |                                    |      |     |
|-------------------------------------------------|------------------------------------|------|-----|
|                                                 | Diced & Crushed Tomatoes           | 3    | 0   |
|                                                 | Diced Tomatoes                     | 407  | 70  |
|                                                 | Stewed Tomatoes                    | 75   | 1   |
|                                                 | Tomato Paste                       | 80   | 10  |
|                                                 | Tomato Puree                       | 26   | 8   |
|                                                 | Tomato Sauce                       | 148  | 22  |
|                                                 | Tomato Sauce (Flavored)            | 19   | 1   |
|                                                 | Whole & Peeled Tomatoes            | 109  | 19  |
|                                                 | Total                              | 969  | 155 |
| <b>Canned &amp;<br/>Prepared<br/>Vegetables</b> | Canned & Jarred Mixed Vegetables   | 50   | 0   |
|                                                 | Canned & Jarred Mushrooms          | 90   | 14  |
|                                                 | Canned Artichokes                  | 65   | 1   |
|                                                 | Canned Asparagus                   | 25   | 0   |
|                                                 | Canned Beets                       | 67   | 4   |
|                                                 | Canned Cabbage                     | 7    | 0   |
|                                                 | Canned Carrots                     | 50   | 0   |
|                                                 | Canned Corn                        | 177  | 20  |
|                                                 | Canned Green Beans                 | 170  | 19  |
|                                                 | Canned Green Chilies               | 38   | 4   |
|                                                 | Canned Hearts of Palm              | 13   | 1   |
|                                                 | Canned Okra                        | 1    | 0   |
|                                                 | Canned Onions                      | 2    | 0   |
|                                                 | Canned Peas                        | 87   | 15  |
|                                                 | Canned Peas & Carrots              | 16   | 0   |
|                                                 | Canned Potatoes                    | 38   | 0   |
|                                                 | Canned Pumpkin                     | 1    | 0   |
|                                                 | Canned Sauerkraut                  | 51   | 7   |
|                                                 | Canned Spinach                     | 10   | 0   |
|                                                 | Canned Sweet Potatoes & Yams       | 14   | 1   |
|                                                 | Other Canned & Jarred Vegetables   | 65   | 3   |
|                                                 | Bruschetta                         | 34   | 0   |
|                                                 | Capers                             | 19   | 8   |
|                                                 | Jalapeno Peppers                   | 95   | 9   |
|                                                 | Olives                             | 550  | 47  |
|                                                 | Other Deli Goods                   | 248  | 19  |
|                                                 | Peppers                            | 168  | 8   |
|                                                 | Pickled Garlic                     | 20   | 2   |
|                                                 | Pickles                            | 594  | 28  |
|                                                 | Relish                             | 135  | 10  |
|                                                 | Sun Dried Tomatoes                 | 27   | 6   |
|                                                 | Tapenade & Other Vegetable Spreads | 54   | 0   |
|                                                 | Total                              | 2981 | 226 |

|                                         |                                                    |      |     |
|-----------------------------------------|----------------------------------------------------|------|-----|
| <b>Canned Meals &amp; Chili</b>         | Canned Beans & Wieners                             | 8    | 0   |
|                                         | Canned Beef Stew & Chili                           | 17   | 0   |
|                                         | Canned Chicken Stew & Chili                        | 12   | 0   |
|                                         | Canned Chili Sauce                                 | 20   | 0   |
|                                         | Canned Chili with Meat and Beans                   | 66   | 0   |
|                                         | Canned Chili with Meat and No Beans                | 41   | 0   |
|                                         | Canned Chili Without Meat and With Beans           | 13   | 4   |
|                                         | Canned Pork & Beans                                | 31   | 0   |
|                                         | Canned Ravioli                                     | 21   | 2   |
|                                         | Canned Turkey Stew & Chili                         | 2    | 0   |
|                                         | Other Canned Chili & Stews                         | 3    | 0   |
|                                         | Other Canned Meals                                 | 64   | 2   |
|                                         | Canned Hash                                        | 26   | 0   |
|                                         | Total                                              | 324  | 8   |
| <b>Cheese &amp; Cheese Alternatives</b> | Alternative/Non-Dairy Cheeses                      | 119  | 32  |
|                                         | Block Cheese                                       | 729  | 55  |
|                                         | Canned Cheese                                      | 24   | 0   |
|                                         | Cheese Curds                                       | 36   | 0   |
|                                         | Cheese Cut for Crackers                            | 71   | 0   |
|                                         | Cheese Dip                                         | 144  | 3   |
|                                         | Cheese in Rind (Not Wax)                           | 22   | 0   |
|                                         | Cheese Sticks                                      | 80   | 6   |
|                                         | Cream Cheese                                       | 146  | 10  |
|                                         | Cubed/Chunked/Crumbled Cheese                      | 141  | 12  |
|                                         | Flavored Cottage Cheese                            | 58   | 0   |
|                                         | Flavored Cream Cheese                              | 95   | 0   |
|                                         | Fondue                                             | 3    | 0   |
|                                         | Goat Cheese (including feta)                       | 248  | 10  |
|                                         | Grated Cheese                                      | 109  | 3   |
|                                         | Individually packaged (not stick or string) Cheese | 44   | 0   |
|                                         | Novelty Cheese Products Cheese                     | 5    | 0   |
|                                         | Other Cheeses                                      | 42   | 0   |
|                                         | Plain Cottage Cheese                               | 201  | 15  |
|                                         | Processed Cheese Block Cheese                      | 52   | 3   |
|                                         | Shaved Cheese                                      | 19   | 0   |
|                                         | Shredded Cheese                                    | 610  | 35  |
|                                         | Shredded Mexican style Cheese                      | 116  | 9   |
|                                         | Sliced & Singles Cheese                            | 620  | 49  |
|                                         | Soft Cheese                                        | 164  | 3   |
|                                         | Spreadable Cheese                                  | 129  | 3   |
|                                         | String Cheese                                      | 123  | 12  |
|                                         | Total                                              | 4150 | 260 |
| <b>Chips &amp; Snacks</b>               | Bagel Chips                                        | 9    | 1   |

---

|                                |      |     |
|--------------------------------|------|-----|
| Beef Sticks & Jerky            | 296  | 23  |
| Cheese Puffs                   | 317  | 22  |
| Chickpea Snacks                | 67   | 9   |
| Children's Snack Bars          | 49   | 69  |
| Coated Pretzels                | 176  | 0   |
| Corn Kernel Snacks             | 21   | 0   |
| Cracker Crisps                 | 68   | 7   |
| Cracker Sticks                 | 1    | 0   |
| Flavored Popcorn (Popped)      | 482  | 41  |
| Granola Bars                   | 257  | 46  |
| Lunchables                     | 73   | 2   |
| Meat Snacks                    | 63   | 2   |
| Meat Snacks (Vegetarian)       | 25   | 2   |
| Onion Ring Snacks              | 27   | 3   |
| Other Chips & Snacks           | 329  | 11  |
| Other Lunch Snack Combinations | 256  | 10  |
| Other Meat Sticks & Jerky      | 174  | 0   |
| Other Snacks                   | 241  | 31  |
| Pita Chips                     | 63   | 3   |
| Pork Rinds                     | 169  | 0   |
| Pork Sticks & Jerky            | 86   | 0   |
| Potato Chips & Potato Snacks   | 1398 | 27  |
| Pretzel Chips                  | 16   | 0   |
| Pretzel Crackers               | 4    | 1   |
| Pretzels                       | 255  | 9   |
| Rice Cakes                     | 55   | 33  |
| Rice Chips                     | 7    | 0   |
| Rice Snacks                    | 61   | 11  |
| Salmon Sticks & Jerky          | 9    | 0   |
| Seaweed                        | 12   | 13  |
| Sesame Sticks                  | 25   | 0   |
| Snack Mixes                    | 258  | 10  |
| Sweet Potato Chips             | 35   | 4   |
| Tortilla & Corn Chips          | 592  | 93  |
| Trail Mix Bars                 | 35   | 0   |
| Turkey Sticks & Jerky          | 57   | 7   |
| Variety Snack Packs            | 5    | 0   |
| Veggie Snacks                  | 230  | 58  |
| Venison or Deer Sticks & Jerky | 4    | 0   |
| Wheat & Multigrain Snacks      | 53   | 5   |
| Soy Snacks, Chips & Nuts       | 6    | 0   |
| Total                          | 6366 | 553 |

|                                   |                                  |      |     |
|-----------------------------------|----------------------------------|------|-----|
| <b>Cold Cereals &amp; Granola</b> | Bran Cereals                     | 79   | 7   |
|                                   | Corn Cereals                     | 190  | 21  |
|                                   | Granola Cereals                  | 399  | 122 |
|                                   | Multigrain Cereals               | 163  | 7   |
|                                   | Oat Cereal                       | 177  | 21  |
|                                   | Other Cold Cereal                | 515  | 64  |
|                                   | Rice Cereals                     | 122  | 6   |
|                                   | Sprouted Cereals                 | 0    | 17  |
|                                   | Sprouted Granola                 | 0    | 4   |
|                                   | Wheat Cereals                    | 129  | 6   |
|                                   | Total                            | 1774 | 275 |
| <b>Condiments</b>                 | Aioli                            | 6    | 1   |
|                                   | Barbecue Sauces                  | 424  | 36  |
|                                   | Cheese Sauces                    | 35   | 0   |
|                                   | Chicken Wing Sauces              | 73   | 1   |
|                                   | Chili or Hot Sauces              | 267  | 10  |
|                                   | Chili Paste                      | 2    | 1   |
|                                   | Chutney                          | 11   | 0   |
|                                   | Curry Paste                      | 19   | 1   |
|                                   | Curry Sauce                      | 57   | 9   |
|                                   | Duck Sauce                       | 6    | 0   |
|                                   | Fish Sauce                       | 5    | 0   |
|                                   | Green Enchilada Sauce            | 26   | 3   |
|                                   | Green Mole Sauce                 | 6    | 0   |
|                                   | Hoisin Sauce                     | 11   | 3   |
|                                   | Horseradish Sauce                | 40   | 0   |
|                                   | Ketchup                          | 187  | 40  |
|                                   | Kimchi                           | 34   | 2   |
|                                   | Miso Paste                       | 6    | 0   |
|                                   | Mustard                          | 257  | 46  |
|                                   | Negro Mole Sauce                 | 5    | 1   |
|                                   | Other Mexican Style Sauces       | 74   | 2   |
|                                   | Other Sauces                     | 110  | 5   |
|                                   | Oyster Sauce                     | 9    | 0   |
|                                   | Plum Sauce                       | 4    | 0   |
|                                   | Poblano (Red) Mole Sauce         | 12   | 1   |
|                                   | Red Enchilada Sauce              | 41   | 7   |
|                                   | Sandwich Spreads & Other Spreads | 26   | 2   |
|                                   | Sesame Sauce                     | 9    | 0   |
|                                   | Steak Sauces                     | 56   | 5   |
|                                   | Taco Sauce                       | 54   | 8   |
|                                   | Tartar Sauce                     | 31   | 3   |
|                                   | Wasabi                           | 3    | 0   |

|                                            | Total | 1906 | 187 |
|--------------------------------------------|-------|------|-----|
| <b>Cookies &amp; Biscuits</b>              |       |      |     |
| Almond & Nut Cookies                       | 33    | 1    |     |
| Animal Crackers                            | 39    | 21   |     |
| Assorted Cookies & Biscuits                | 29    | 0    |     |
| Biscotti                                   | 47    | 0    |     |
| Cakes & Cookie Bars                        | 21    | 0    |     |
| Chocolate Chip Cookies                     | 261   | 16   |     |
| Chocolate Covered Cookies                  | 94    | 2    |     |
| Cookie Bars                                | 28    | 0    |     |
| Cookie Sticks                              | 3     | 0    |     |
| European Cookies & Biscuits                | 139   | 1    |     |
| Fruit Filled & Flavored Cookies & Biscuits | 145   | 3    |     |
| Fudge Cookies & Biscuits                   | 62    | 0    |     |
| Ginger & Gingerbread Cookies & Biscuits    | 95    | 3    |     |
| Graham Crackers                            | 92    | 32   |     |
| Granola Cookies                            | 32    | 4    |     |
| Kids & Promotional Cookies                 | 46    | 5    |     |
| Lady Fingers                               | 1     | 1    |     |
| Macaroons                                  | 23    | 2    |     |
| Meringues                                  | 6     | 2    |     |
| Oatmeal Cookies                            | 116   | 5    |     |
| Other Cookies & Biscuits                   | 396   | 12   |     |
| Peanut Butter Cookies & Biscuits           | 40    | 1    |     |
| Plain Cookies & Biscuits                   | 24    | 0    |     |
| Sandwich Cookies                           | 436   | 7    |     |
| Shortbread                                 | 84    | 0    |     |
| Sugar Free Cookies                         | 34    | 0    |     |
| Sweet Biscuit Snacks                       | 75    | 4    |     |
| Vanilla & Sugar Cookies                    | 281   | 3    |     |
| Wafers                                     | 170   | 5    |     |
| Total                                      | 2852  | 130  |     |
| <b>Crackers</b>                            |       |      |     |
| Assorted Crackers                          | 2     | 0    |     |
| Cheese & Peanut Butter                     | 245   | 24   |     |
| Crackerbread                               | 44    | 19   |     |
| Crackers & Dip                             | 74    | 1    |     |
| Kids & Promotional Crackers                | 2     | 2    |     |
| Matzo & Kichel Crackers                    | 8     | 0    |     |
| Nut Crackers                               | 10    | 0    |     |
| Other Crackers                             | 248   | 40   |     |
| Other Flavored Crackers                    | 63    | 3    |     |
| Other Wheat Based Crackers                 | 166   | 18   |     |
| Oyster Crackers                            | 17    | 0    |     |
| Rice Crackers                              | 51    | 6    |     |

|                                               |                                   |      |     |
|-----------------------------------------------|-----------------------------------|------|-----|
|                                               | Saltine Crackers                  | 52   | 6   |
|                                               | Sandwich Crackers                 | 108  | 4   |
|                                               | Sesame Crackers                   | 19   | 2   |
|                                               | Toasted Crackers                  | 16   | 1   |
|                                               | Total                             | 1125 | 126 |
| <b>Dessert Toppings</b>                       | Whipped Toppings                  | 61   | 0   |
|                                               | Butterscotch Chips                | 6    | 0   |
|                                               | Butterscotch or Caramel           | 18   | 2   |
|                                               | Carob Chips                       | 1    | 1   |
|                                               | Chocolate Syrup                   | 39   | 4   |
|                                               | Cream, Flavored & Whipping Creams | 94   | 10  |
|                                               | Dairy Toppings                    | 50   | 0   |
|                                               | Fondant                           | 17   | 0   |
|                                               | Fruit Syrup                       | 49   | 7   |
|                                               | Hot Fudge                         | 10   | 0   |
|                                               | Maraschino Cherries               | 53   | 0   |
|                                               | Other Dessert Chips               | 26   | 3   |
|                                               | Other Fruit Toppings              | 13   | 0   |
|                                               | Total                             | 437  | 27  |
| <b>Frozen Desserts</b>                        | Apple Pie                         | 14   | 0   |
|                                               | Blueberry Pie                     | 8    | 0   |
|                                               | Cherry Pie                        | 11   | 0   |
|                                               | Chocolate Creme Pie               | 4    | 0   |
|                                               | Frozen Cakes                      | 28   | 0   |
|                                               | Frozen Non-Dairy Desserts         | 326  | 42  |
|                                               | Frozen Pastries                   | 61   | 0   |
|                                               | Fudge Bars                        | 39   | 5   |
|                                               | Ice Pops & Juice Bars             | 268  | 28  |
|                                               | Italian Ice                       | 37   | 0   |
|                                               | Key Lime Pie                      | 7    | 0   |
|                                               | Lemon Meringue Pie                | 4    | 0   |
|                                               | Other Frozen Desserts             | 81   | 2   |
|                                               | Other Pies                        | 130  | 0   |
|                                               | Peach Pie                         | 5    | 0   |
|                                               | Pecan Pie                         | 4    | 0   |
|                                               | Pumpkin Pie                       | 9    | 0   |
|                                               | Soy Desserts                      | 0    | 1   |
|                                               | Total                             | 1036 | 78  |
| <b>Frozen Meals, Side Dishes &amp; Snacks</b> | Burger Dinners                    | 1    | 0   |
|                                               | Burritos                          | 116  | 14  |
|                                               | Chimichanga                       | 17   | 0   |
|                                               | Enchiladas & Fajitas              | 41   | 1   |
|                                               | Flatbreads & Panini's             | 26   | 0   |

---

|                                                       |     |    |
|-------------------------------------------------------|-----|----|
| French Fries                                          | 164 | 8  |
| Frozen Asian Appetizers                               | 60  | 1  |
| Frozen Beef Based Appetizers                          | 23  | 0  |
| Frozen Beef Based Meals, Large                        | 42  | 3  |
| Frozen Beef Based Meals, Medium                       | 75  | 1  |
| Frozen Beef Based Meals, Small                        | 8   | 0  |
| Frozen Blintzes                                       | 2   | 0  |
| Frozen Cheese Sticks, Cheese Nuggets, & Cheese Snacks | 72  | 1  |
| Frozen Chicken Based Appetizers                       | 28  | 0  |
| Frozen Chicken Based Meals - Large                    | 155 | 9  |
| Frozen Chicken Based Meals - Medium                   | 261 | 1  |
| Frozen Chicken Based Meals - Small                    | 68  | 0  |
| Frozen Chicken Nuggets, Wings & Strips                | 281 | 21 |
| Frozen Corndogs                                       | 37  | 0  |
| Frozen Egg Rolls                                      | 27  | 0  |
| Frozen Falafel                                        | 13  | 0  |
| Frozen Meat Pies                                      | 72  | 1  |
| Frozen Meatballs                                      | 26  | 2  |
| Frozen Meatloaf & Meatball Meals                      | 47  | 2  |
| Frozen Mini Burger & Sliders                          | 41  | 0  |
| Frozen Other Frozen Appetizers & Hors D'oeuvres       | 57  | 3  |
| Frozen Other Frozen Mexican Style Appetizers          | 59  | 0  |
| Frozen Pasta Based Appetizers                         | 16  | 0  |
| Frozen Pasta Meals                                    | 727 | 18 |
| Frozen Pierogies                                      | 27  | 0  |
| Frozen Popcorn Chicken                                | 8   | 0  |
| Frozen Pork Based Appetizers                          | 3   | 0  |
| Frozen Pork Based Meals, Large                        | 11  | 0  |
| Frozen Pork Based Meals, Medium                       | 17  | 0  |
| Frozen Pork Based Meals, Small                        | 4   | 0  |
| Frozen Potato Skins                                   | 16  | 0  |
| Frozen Prepared Tacos & Mini Tacos                    | 21  | 1  |
| Frozen Pretzel Sticks                                 | 33  | 1  |
| Frozen Rice Based Meals                               | 3   | 1  |
| Frozen Sandwiches, Paninis & Pouches                  | 257 | 0  |
| Frozen Sausage Based Meals                            | 8   | 0  |
| Frozen Seafood Based Appetizers                       | 75  | 0  |
| Frozen Seafood Based Meals, Medium                    | 33  | 0  |
| Frozen Seafood Based Meals, Small                     | 8   | 0  |
| Frozen Soups                                          | 48  | 8  |
| Frozen Stuffed Peppers & Jalapenos                    | 24  | 0  |
| Frozen Turkey Based Meals, Large                      | 16  | 0  |

|                                                  |                                      |      |     |
|--------------------------------------------------|--------------------------------------|------|-----|
|                                                  | Frozen Turkey Based Meals, Medium    | 14   | 0   |
|                                                  | Frozen Turkey Based Meals, Small     | 2    | 0   |
|                                                  | Frozen Vegetable Based Appetizers    | 48   | 4   |
|                                                  | Frozen Vegetable Based Meals, Medium | 96   | 10  |
|                                                  | Frozen Vegetable Based Meals, Small  | 10   | 3   |
|                                                  | Mixed Frozen Vegetables              | 2    | 1   |
|                                                  | Onion Rings                          | 25   | 0   |
|                                                  | Other Frozen Meals                   | 58   | 2   |
|                                                  | Quesadillas                          | 15   | 0   |
|                                                  | Seafood Based Meals, Large           | 8    | 0   |
|                                                  | Taquitos                             | 46   | 0   |
|                                                  | Vegetable Based Meals, Large         | 44   | 1   |
|                                                  | Total                                | 3542 | 118 |
| <b>Frozen Pizzas</b>                             | Bread & Single Serve Frozen Pizza    | 103  | 2   |
|                                                  | Frozen Calzones                      | 21   | 0   |
|                                                  | Frozen Cheese Pizza                  | 175  | 7   |
|                                                  | Frozen Chicken Pizza                 | 54   | 1   |
|                                                  | Frozen Deluxe & Supreme Pizza        | 94   | 0   |
|                                                  | Frozen Other Meat Pizza              | 175  | 0   |
|                                                  | Frozen Pepperoni Pizza               | 156  | 2   |
|                                                  | Frozen Sausage Pizza                 | 55   | 0   |
|                                                  | Frozen Seafood Pizza                 | 156  | 1   |
|                                                  | Frozen Vegetable Pizza               | 117  | 12  |
|                                                  | Other Frozen Pizzas                  | 103  | 1   |
|                                                  | Total                                | 1209 | 26  |
| <b>Fruit &amp; Vegetable Juices &amp; Drinks</b> | Acai Juice                           | 0    | 1   |
|                                                  | Almond Water                         | 1    | 0   |
|                                                  | Aloe Waters                          | 5    | 3   |
|                                                  | Apple Juice                          | 128  | 44  |
|                                                  | Apricot Juice                        | 2    | 0   |
|                                                  | Beet Juice                           | 4    | 4   |
|                                                  | Beverage Concentrates                | 26   | 12  |
|                                                  | Blueberry Juice                      | 1    | 0   |
|                                                  | Carrot Juice                         | 0    | 2   |
|                                                  | Cherry Juice                         | 43   | 3   |
|                                                  | Chia Beverages                       | 1    | 4   |
|                                                  | Ciders                               | 40   | 13  |
|                                                  | Coconut Juice                        | 3    | 0   |
|                                                  | Coconut Water                        | 59   | 19  |
|                                                  | Cranberry Juice                      | 84   | 14  |
|                                                  | Frozen Fruit & Juice - Fruit Puree   | 3    | 3   |
|                                                  | Fruit Smoothie                       | 48   | 28  |
|                                                  | Grape Juice                          | 71   | 17  |

|                                             |                               |      |     |
|---------------------------------------------|-------------------------------|------|-----|
|                                             | Grapefruit Juice              | 29   | 0   |
|                                             | Guava Juice                   | 13   | 0   |
|                                             | Lemon Juice                   | 30   | 10  |
|                                             | Lemonade and Limeade          | 259  | 89  |
|                                             | Lime Juice                    | 21   | 0   |
|                                             | Mango Juice                   | 28   | 1   |
|                                             | Mixed Berry Juice             | 40   | 6   |
|                                             | Mixed Fruit & Vegetable Juice | 165  | 122 |
|                                             | Mixed Fruit Juice             | 482  | 132 |
|                                             | Orange Juice                  | 195  | 19  |
|                                             | Other Beverages               | 305  | 91  |
|                                             | Other Juice Flavors           | 35   | 25  |
|                                             | Papaya Juice                  | 3    | 0   |
|                                             | Passion Fruit Juice           | 11   | 1   |
|                                             | Peach Juice                   | 11   | 0   |
|                                             | Pear Juice                    | 4    | 1   |
|                                             | Pineapple Juice               | 21   | 0   |
|                                             | Pomegranate Juice             | 11   | 4   |
|                                             | Probiotic Non-Dairy Drinks    | 35   | 131 |
|                                             | Prune Juice                   | 9    | 2   |
|                                             | Raspberry Juice               | 2    | 0   |
|                                             | Sparkling Fruit Juice         | 99   | 26  |
|                                             | Strawberry Juice              | 4    | 0   |
|                                             | Tangerine Juice               | 1    | 0   |
|                                             | Tomato Juice                  | 60   | 5   |
|                                             | Vegetable Juice               | 67   | 9   |
|                                             | Watermelon Juice              | 18   | 4   |
|                                             | Total                         | 2477 | 845 |
| <b>Gelatins, Puddings<br/>&amp; Pectins</b> | Bread Pudding                 | 2    | 0   |
|                                             | Custard                       | 10   | 4   |
|                                             | Flan                          | 10   | 0   |
|                                             | Flan Mix                      | 5    | 0   |
|                                             | Fruit Gelatins                | 86   | 0   |
|                                             | Gelatin Mixes & Desserts      | 189  | 0   |
|                                             | Pudding                       | 228  | 14  |
|                                             | Pudding Mix                   | 138  | 4   |
|                                             | Total                         | 668  | 22  |
| <b>Half and Half &amp;<br/>Creamers</b>     | Creamers (Dry, Flavored)      | 14   | 0   |
|                                             | Creamers (Dry, Plain)         | 19   | 0   |
|                                             | Creamers (Liquid, Flavored)   | 205  | 4   |
|                                             | Creamers (Liquid, Plain)      | 24   | 4   |
|                                             | Fat Free Half and Half        | 21   | 0   |
|                                             | Half and Half                 | 80   | 28  |

|                                      |                                                                            |      |     |
|--------------------------------------|----------------------------------------------------------------------------|------|-----|
|                                      | Low Fat Half and Half                                                      | 2    | 0   |
|                                      | Non-dairy Creamers (Dry)                                                   | 55   | 0   |
|                                      | Non-dairy Creamers (Liquid)                                                | 41   | 4   |
|                                      | Total                                                                      | 461  | 40  |
| <b>Ice Cream &amp; Frozen Yogurt</b> | Frozen Yogurt                                                              | 58   | 5   |
|                                      | Gelato                                                                     | 142  | 0   |
|                                      | Ice Cream Bars                                                             | 395  | 11  |
|                                      | Ice Cream Cake                                                             | 52   | 0   |
|                                      | Ice Cream Cones                                                            | 117  | 6   |
|                                      | Ice Cream Sandwiches                                                       | 212  | 18  |
|                                      | Ice Cream with Candy                                                       | 189  | 25  |
|                                      | Ice Cream with Cookies                                                     | 121  | 8   |
|                                      | Ice Cream with Multiple Types of Desserts, Candies, Nuts, and Other Treats | 808  | 33  |
|                                      | Ice Cream with Nuts                                                        | 79   | 1   |
|                                      | Ice Cream with Topping in Stripes                                          | 181  | 3   |
|                                      | Multiple Flavor Ice Cream                                                  | 117  | 3   |
|                                      | Other Ice Cream Novelties                                                  | 79   | 2   |
|                                      | Sherbet                                                                    | 65   | 0   |
|                                      | Smooth Ice Cream                                                           | 407  | 41  |
|                                      | Sorbet                                                                     | 60   | 6   |
|                                      | Total                                                                      | 3082 | 162 |
| <b>Iced Teas</b>                     | Decaffeinated Iced Teas                                                    | 10   | 6   |
|                                      | Kombucha & Other Fermented Beverages                                       | 76   | 250 |
|                                      | Lemon Flavored Iced Teas                                                   | 70   | 12  |
|                                      | Other Flavored Iced Teas                                                   | 336  | 116 |
|                                      | Red Iced Teas                                                              | 0    | 1   |
|                                      | Sweet Iced Teas                                                            | 72   | 8   |
|                                      | Yerba Mate Drinks                                                          | 11   | 23  |
|                                      | Total                                                                      | 575  | 416 |
| <b>Jams &amp; Jellies</b>            | Apple Flavored Jams & Jellies                                              | 17   | 0   |
|                                      | Apricot Flavored Jams & Jellies                                            | 27   | 4   |
|                                      | Blackberry Flavored Jams & Jellies                                         | 32   | 2   |
|                                      | Blueberry Flavored Jams & Jellies                                          | 17   | 6   |
|                                      | Boysenberry Flavored Jams & Jellies                                        | 3    | 0   |
|                                      | Cherry Flavored Jams & Jellies                                             | 22   | 5   |
|                                      | Fig Flavored Jams & Jellies                                                | 14   | 4   |
|                                      | Grape Flavored Jams & Jellies                                              | 75   | 6   |
|                                      | Mixed Fruit Flavored Jams & Jellies                                        | 76   | 9   |
|                                      | Orange Flavored Jams & Jellies                                             | 26   | 5   |
|                                      | Other Flavored Jams & Jellies                                              | 101  | 3   |
|                                      | Peach Flavored Jams & Jellies                                              | 25   | 1   |
|                                      | Pineapple Flavored Jams & Jellies                                          | 4    | 0   |

|                                    |                                    |     |    |
|------------------------------------|------------------------------------|-----|----|
|                                    | Plum Flavored Jams & Jellies       | 11  | 0  |
|                                    | Raspberry Flavored Jams & Jellies  | 54  | 12 |
|                                    | Strawberry Flavored Jams & Jellies | 109 | 13 |
|                                    | Total                              | 613 | 70 |
| <b>Milk &amp;<br/>Alternatives</b> | 1% Fat Buttermilk                  | 14  | 1  |
|                                    | 1% Fat Cow's Milk                  | 89  | 32 |
|                                    | 2% Evaporated Milk                 | 3   | 0  |
|                                    | 2% Fat Buttermilk                  | 6   | 0  |
|                                    | 2% Fat Cow's Milk                  | 124 | 74 |
|                                    | Almond Milk Flavored               | 91  | 29 |
|                                    | Almond Milk Plain                  | 60  | 27 |
|                                    | Blended Non-Dairy Beverages        | 2   | 3  |
|                                    | Cashew Milk Flavored               | 5   | 1  |
|                                    | Cashew Milk Plain                  | 5   | 0  |
|                                    | Coconut Milk, Flavored             | 7   | 11 |
|                                    | Coconut Milk, Plain                | 37  | 32 |
|                                    | Condensed Milk                     | 43  | 3  |
|                                    | Eggnog                             | 47  | 7  |
|                                    | Evaporated Whole Milk              | 29  | 2  |
|                                    | Fat Free & Skim Buttermilk         | 7   | 0  |
|                                    | Fat Free & Skim Cow's Milk         | 100 | 37 |
|                                    | Fat Free & Skim Evaporated Milk    | 13  | 0  |
|                                    | Flavored Cow's Milk                | 152 | 37 |
|                                    | Flax Milk Flavored                 | 4   | 0  |
|                                    | Flax Milk Plain                    | 2   | 0  |
|                                    | Goat Milk                          | 6   | 0  |
|                                    | Hazelnut Milk Flavored             | 1   | 0  |
|                                    | Hazelnut Milk Plain                | 2   | 0  |
|                                    | Hemp Milk Flavored                 | 7   | 0  |
|                                    | Hemp Milk Plain                    | 1   | 0  |
|                                    | Lactose Free Milk                  | 77  | 8  |
|                                    | Oat Milk Flavored                  | 18  | 3  |
|                                    | Oat Milk Plain                     | 38  | 8  |
|                                    | Other Dairy Beverage               | 15  | 0  |
|                                    | Other Plant Based Milks            | 55  | 13 |
|                                    | Powdered Low-Fat Milk              | 1   | 1  |
|                                    | Powdered Milk, Non-Fat             | 22  | 0  |
|                                    | Powdered Whole Milk                | 14  | 0  |
|                                    | Rice Milk Flavored                 | 1   | 0  |
|                                    | Rice Milk Plain                    | 1   | 2  |
|                                    | Shakes                             | 5   | 0  |
|                                    | Soy Milk Flavored                  | 18  | 16 |
|                                    | Soy Milk Plain                     | 12  | 20 |

|                                  |                                        |      |     |
|----------------------------------|----------------------------------------|------|-----|
|                                  | Soy Milk Plain, Reduced Fat            | 1    | 0   |
|                                  | Whole Buttermilk                       | 2    | 0   |
|                                  | Whole Cow's Milk                       | 128  | 55  |
|                                  | Total                                  | 396  | 81  |
| <b>Oatmeal &amp; Hot Cereals</b> | Cream of Wheat Cereals, Flavored       | 21   | 0   |
|                                  | Cream of Wheat Cereals, Plain          | 15   | 1   |
|                                  | Grits, Flavored                        | 7    | 0   |
|                                  | Grits, Plain                           | 22   | 0   |
|                                  | Oatmeal with Fruit                     | 7    | 4   |
|                                  | Oatmeal, Flavored                      | 239  | 52  |
|                                  | Oatmeal, Plain                         | 28   | 2   |
|                                  | Oats, Plain                            | 3    | 2   |
|                                  | Other Hot Cereals                      | 25   | 18  |
|                                  | Prepared Oatmeal                       | 29   | 2   |
|                                  | Total                                  | 396  | 81  |
| <b>Pasta &amp; Noodles</b>       | Sprouted Pasta                         | 1    | 2   |
|                                  | Angel Hair                             | 34   | 4   |
|                                  | Barley, Quinoa & Other Pasta & Noodles | 62   | 39  |
|                                  | Chow Mein & Lo Mein                    | 16   | 0   |
|                                  | Egg Noodles                            | 114  | 3   |
|                                  | Elbows & Macaroni                      | 90   | 3   |
|                                  | Farfalle                               | 15   | 1   |
|                                  | Fettuccine                             | 31   | 0   |
|                                  | Fresh Vegetable Based Noodles & Rice   | 9    | 1   |
|                                  | Gnocchi                                | 32   | 1   |
|                                  | Instant Noodles                        | 58   | 7   |
|                                  | Lasagne                                | 47   | 1   |
|                                  | Linguine                               | 39   | 3   |
|                                  | Non-Grain Pastas                       | 32   | 25  |
|                                  | Oriental Noodles                       | 39   | 13  |
|                                  | Other Pasta Styles                     | 194  | 25  |
|                                  | Pasta Shapes & Alphabet                | 18   | 2   |
|                                  | Penne                                  | 77   | 7   |
|                                  | Rigatoni                               | 40   | 3   |
|                                  | Rotini                                 | 60   | 3   |
|                                  | Shell Shaped Pasta                     | 50   | 2   |
|                                  | Shells and Cheese                      | 83   | 23  |
|                                  | Spaghetti                              | 137  | 15  |
|                                  | Tortellini & Ravioli                   | 214  | 25  |
|                                  | Vermicelli                             | 8    | 0   |
|                                  | Total                                  | 1500 | 208 |
| <b>Pasta &amp; Pizza Sauces</b>  | Alfredo & Cream Based Sauce            | 88   | 8   |
|                                  | Arrabbiata                             | 25   | 5   |

|                                                  |                                                  |      |     |
|--------------------------------------------------|--------------------------------------------------|------|-----|
|                                                  | Cheese Flavored Pasta Sauce                      | 57   | 6   |
|                                                  | Chunky Pasta Sauce                               | 44   | 2   |
|                                                  | Marinara Sauce                                   | 124  | 25  |
|                                                  | Meat Flavored Pasta Sauce                        | 74   | 0   |
|                                                  | Mushroom Flavored Pasta Sauce                    | 53   | 4   |
|                                                  | Other Pizza and Pasta Sauces                     | 112  | 17  |
|                                                  | Pesto                                            | 83   | 10  |
|                                                  | Pizza Sauce                                      | 63   | 11  |
|                                                  | Traditional Italian Pasta Sauce                  | 236  | 48  |
|                                                  | Vegetable Based Pasta Sauce                      | 16   | 5   |
|                                                  | Vodka Sauce                                      | 30   | 1   |
|                                                  | Total                                            | 1005 | 142 |
| <b>Peanut Butter &amp;<br/>Other Nut Butters</b> | Almond Butters                                   | 51   | 5   |
|                                                  | Cashew Butters                                   | 12   | 7   |
|                                                  | Flavored Almond Butter                           | 69   | 3   |
|                                                  | Flavored Cashew Butter                           | 7    | 0   |
|                                                  | Flavored Hazelnut Butter                         | 25   | 3   |
|                                                  | Flavored Macadamia Butter                        | 6    | 0   |
|                                                  | Flavored Peanut Butter                           | 53   | 5   |
|                                                  | Flavored Seed Butter                             | 0    | 6   |
|                                                  | Hazelnut Butter                                  | 3    | 1   |
|                                                  | Other Nut & Seed Butters & Spreads               | 25   | 16  |
|                                                  | Peanut Butter                                    | 267  | 61  |
|                                                  | Peanut Butter & Jelly Spreads                    | 8    | 0   |
|                                                  | Pistachio Butters                                | 2    | 0   |
|                                                  | Sunflower Seed Butters                           | 5    | 12  |
|                                                  | Walnut Butter                                    | 4    | 1   |
|                                                  | Total                                            | 537  | 120 |
| <b>Powdered Drinks</b>                           | Berry Flavored Powdered Drinks                   | 21   | 0   |
|                                                  | Cherry Flavored Powdered Drinks                  | 21   | 0   |
|                                                  | Grape Flavored Powdered Drinks                   | 45   | 0   |
|                                                  | Grapefruit Flavored Powdered Drinks              | 1    | 0   |
|                                                  | Lemon & Lime Flavored Powdered Drinks            | 22   | 0   |
|                                                  | Lemonade Flavored Powdered Drinks                | 111  | 0   |
|                                                  | Mixed Fruit Flavored Powdered Drinks             | 130  | 0   |
|                                                  | Orange & Mandarin Flavored Powdered Drinks       | 39   | 0   |
|                                                  | Other Fruit Flavored Powdered Drinks             | 43   | 0   |
|                                                  | Other Powdered Drinks                            | 75   | 14  |
|                                                  | Powdered Iced Teas & Tea Mixes                   | 155  | 9   |
|                                                  | Powdered Instant Cocoa & Flavored or Malted Milk | 255  | 15  |
|                                                  | Powdered Smoothie Mixes                          | 20   | 10  |
|                                                  | Powdered Spiced Cider                            | 7    | 0   |
|                                                  | Raspberry Flavored Powdered Drinks               | 11   | 0   |

|                                   |                                     |     |    |
|-----------------------------------|-------------------------------------|-----|----|
|                                   | Strawberry Flavored Powdered Drinks | 21  | 0  |
|                                   | Total                               | 977 | 48 |
| <b>Prepared Meals</b>             | Dehydrated Asian Dinner             | 1   | 0  |
|                                   | Dehydrated Chicken Dinner           | 2   | 0  |
|                                   | Mac & Cheese                        | 270 | 35 |
|                                   | Other Dehydrated Dinners            | 33  | 9  |
|                                   | Other Microwaveable Meals           | 80  | 5  |
|                                   | Pasta Dinners                       | 170 | 1  |
|                                   | Ready Made Meals & Rice Mixes       | 244 | 30 |
|                                   | Total                               | 800 | 80 |
| <b>Processed &amp; Deli Meats</b> | Beef & Pork Franks & Wieners        | 70  | 0  |
|                                   | Beef Deli Meats                     | 45  | 4  |
|                                   | Beef Franks & Wieners               | 103 | 7  |
|                                   | Beef Pastrami Deli Meats            | 11  | 0  |
|                                   | Beef Sausages                       | 39  | 3  |
|                                   | Bologna                             | 54  | 0  |
|                                   | Bratwurst                           | 90  | 2  |
|                                   | Breakfast Sausages                  | 60  | 1  |
|                                   | Canadian Bacon                      | 14  | 0  |
|                                   | Canned Ham                          | 17  | 0  |
|                                   | Canned Luncheon Meat                | 25  | 0  |
|                                   | Canned Pate & Meat Spreads          | 16  | 1  |
|                                   | Canned Sausage                      | 25  | 0  |
|                                   | Canned Turkey                       | 3   | 0  |
|                                   | Capicola                            | 3   | 0  |
|                                   | Chicken Deli Meats                  | 59  | 5  |
|                                   | Chicken Franks & Wieners            | 80  | 22 |
|                                   | Chorizo                             | 40  | 2  |
|                                   | Ham                                 | 314 | 6  |
|                                   | Head Cheese & Sousse                | 3   | 0  |
|                                   | Liverwurst                          | 4   | 0  |
|                                   | Maple Sausages                      | 18  | 0  |
|                                   | Meat and Cheese Combination         | 92  | 1  |
|                                   | Meat Spreads & Liverwurst           | 16  | 2  |
|                                   | Mixed Deli Meat                     | 20  | 0  |
|                                   | Mortadella                          | 1   | 0  |
|                                   | Other Cured Meats                   | 13  | 0  |
|                                   | Other Deli Meats                    | 8   | 0  |
|                                   | Other Franks & Wieners              | 87  | 0  |
|                                   | Other Sausages                      | 62  | 3  |
|                                   | Pepperoni                           | 76  | 1  |
|                                   | Polish Sausage                      | 57  | 2  |
|                                   | Pork                                | 23  | 0  |

|                                             |                              |      |     |
|---------------------------------------------|------------------------------|------|-----|
|                                             | Pork Bacon                   | 326  | 7   |
|                                             | Pork Sausages                | 281  | 3   |
|                                             | Prosciutto                   | 30   | 0   |
|                                             | Salami                       | 209  | 1   |
|                                             | Turkey Bacon                 | 42   | 2   |
|                                             | Turkey Deli Meats            | 306  | 13  |
|                                             | Turkey Franks & Wieners      | 47   | 3   |
|                                             | Turkey Pastrami Deli Meats   | 4    | 0   |
|                                             | Total                        | 2793 | 91  |
| <b>Raisins &amp; Other<br/>Fruit Snacks</b> | All Other Berries            | 26   | 7   |
|                                             | Apple Sauce                  | 212  | 56  |
|                                             | Apple Sauce with Other Fruit | 45   | 50  |
|                                             | Banana Snacks                | 33   | 12  |
|                                             | Coconut Snacks               | 18   | 7   |
|                                             | Cranberries                  | 52   | 18  |
|                                             | Dates                        | 6    | 0   |
|                                             | Dried Apples & Apple Chips   | 32   | 3   |
|                                             | Dried Apricots               | 31   | 1   |
|                                             | Dried Cherries               | 17   | 8   |
|                                             | Dried Pineapple              | 25   | 4   |
|                                             | Figs                         | 20   | 1   |
|                                             | Fruit Bars                   | 154  | 54  |
|                                             | Fruit Squeeze                | 34   | 60  |
|                                             | Kids Fruit Snacks            | 287  | 79  |
|                                             | Mango                        | 36   | 5   |
|                                             | Mixed Fruit Snacks           | 36   | 20  |
|                                             | Other Fruit Snacks           | 51   | 11  |
|                                             | Prunes & Plums               | 34   | 0   |
|                                             | Raisins                      | 37   | 9   |
|                                             | Total                        | 1186 | 405 |
| <b>Salad Dressings</b>                      | Asian Dressings              | 14   | 4   |
|                                             | Balsamic Dressing            | 86   | 28  |
|                                             | Blue Cheese Dressing         | 58   | 6   |
|                                             | Caesar Dressings             | 82   | 15  |
|                                             | Cheese Dressings             | 8    | 0   |
|                                             | Cole Slaw Dressings          | 17   | 1   |
|                                             | French Dressings             | 45   | 4   |
|                                             | Garlic Dressing              | 10   | 3   |
|                                             | Ginger Dressing              | 12   | 4   |
|                                             | Greek Dressings              | 24   | 2   |
|                                             | Italian Dressings            | 131  | 13  |
|                                             | Mustard Dressings            | 37   | 8   |
|                                             | Onion Dressings              | 8    | 0   |

|                         |                           |      |     |
|-------------------------|---------------------------|------|-----|
|                         | Other Salad Dressings     | 102  | 14  |
|                         | Poppyseed Dressings       | 27   | 4   |
|                         | Ranch Dressings           | 195  | 35  |
|                         | Raspberry Dressings       | 26   | 4   |
|                         | Russian Dressings         | 4    | 0   |
|                         | Sesame Dressings          | 15   | 7   |
|                         | Strawberry Dressings      | 2    | 0   |
|                         | Tahini Dressings          | 7    | 5   |
|                         | Thousand Island Dressings | 43   | 6   |
|                         | Vinaigrette Dressings     | 86   | 29  |
|                         | Yogurt Salad Dressings    | 32   | 3   |
|                         | Total                     | 1071 | 195 |
| <b>Salad Toppings</b>   | Bacon Bits                | 51   | 0   |
|                         | Croutons                  | 96   | 11  |
|                         | Other Salad Toppings      | 108  | 17  |
|                         | Total                     | 255  | 28  |
| <b>Salsa &amp; Dips</b> | Babaganoush               | 1    | 0   |
|                         | Bean Dip                  | 16   | 4   |
|                         | Caramel & Chocolate Dips  | 40   | 1   |
|                         | Fruit Dips                | 11   | 0   |
|                         | Guacamole Dip             | 122  | 6   |
|                         | Hummus                    | 276  | 53  |
|                         | Mixed Flavor Salsa        | 7    | 0   |
|                         | Onion Dip                 | 60   | 4   |
|                         | Other Dips                | 101  | 10  |
|                         | Plain Salsa               | 666  | 72  |
|                         | Ranch Dip                 | 59   | 5   |
|                         | Seafood Cocktail Sauce    | 67   | 4   |
|                         | Sour Cream Dip            | 15   | 0   |
|                         | Spinach & Artichoke Dip   | 19   | 0   |
|                         | Spinach Dip               | 20   | 1   |
|                         | Tzatziki                  | 18   | 0   |
|                         | Vegetable Dip             | 12   | 0   |
|                         | Total                     | 1510 | 160 |
| <b>Side Dishes</b>      | Dehydrated Tabouli        | 2    | 0   |
|                         | Mashed Potatoes           | 29   | 0   |
|                         | Pasta Salad               | 14   | 0   |
|                         | Polenta                   | 1    | 4   |
|                         | Potato Salads             | 104  | 0   |
|                         | Potatoes Ready to Heat    | 14   | 0   |
|                         | Prepared Gravy            | 85   | 8   |
|                         | Prepared Sausage Gravy    | 9    | 0   |
|                         | Total                     | 258  | 12  |

|                               |                                |      |     |
|-------------------------------|--------------------------------|------|-----|
| <b>Sodas</b>                  | Birch Beer                     | 8    | 0   |
|                               | Cherry Flavored Soda           | 61   | 1   |
|                               | Creme Soda                     | 65   | 0   |
|                               | Diet Cola                      | 202  | 0   |
|                               | Diet Soda                      | 221  | 0   |
|                               | Ginger Ale                     | 152  | 1   |
|                               | Grape Flavored Soda            | 45   | 0   |
|                               | Lemon & Lime Soda              | 127  | 3   |
|                               | Orange Flavored Soda           | 88   | 3   |
|                               | Other Sodas                    | 421  | 17  |
|                               | Regular Cola                   | 198  | 0   |
|                               | Root Beer                      | 89   | 0   |
|                               | Total                          | 1677 | 25  |
| <b>Soups &amp; Soup Mixes</b> | Bean & Lentil Condensed Soup   | 11   | 0   |
|                               | Bean & Lentil Soup             | 10   | 13  |
|                               | Beef Condensed Soup            | 12   | 0   |
|                               | Beef Soup                      | 34   | 0   |
|                               | Broths & Stocks                | 303  | 145 |
|                               | Canned Broccoli Soup           | 2    | 1   |
|                               | Canned Chicken Noodle Soup     | 55   | 5   |
|                               | Cheese Condensed Soup          | 2    | 0   |
|                               | Cheese Soup                    | 6    | 0   |
|                               | Chicken Condensed Soup         | 60   | 1   |
|                               | Chicken Gumbo Soup             | 8    | 0   |
|                               | Chicken Soup                   | 50   | 4   |
|                               | Clam Chowder                   | 37   | 0   |
|                               | Corn Chowder                   | 8    | 3   |
|                               | Cream Of Condensed Soup        | 140  | 11  |
|                               | Cream-based Soup               | 3    | 0   |
|                               | Dehydrated Soup Mixes & Bases  | 211  | 8   |
|                               | French Onion Soup              | 2    | 1   |
|                               | Instant Soups                  | 147  | 8   |
|                               | Matzo Ball Mixes               | 5    | 0   |
|                               | Meatball Soup                  | 14   | 1   |
|                               | Minestrone                     | 15   | 4   |
|                               | Miso Soup & Pastes             | 5    | 5   |
|                               | Other Chowders                 | 5    | 0   |
|                               | Other Chowders Condensed Soup  | 2    | 0   |
|                               | Other Condensed Soup           | 7    | 0   |
|                               | Other Seafood Bisques          | 1    | 0   |
|                               | Other Soups                    | 21   | 2   |
|                               | Other Vegetable Bisques        | 5    | 1   |
|                               | Pasta & Noodles Condensed Soup | 3    | 0   |

|                                     |                                            |      |     |
|-------------------------------------|--------------------------------------------|------|-----|
|                                     | Pasta & Noodles Soup                       | 43   | 11  |
|                                     | Pea Condensed Soup                         | 1    | 0   |
|                                     | Pea Soup                                   | 3    | 0   |
|                                     | Potato Soups                               | 10   | 0   |
|                                     | Prepared Soups                             | 324  | 99  |
|                                     | Sausage & Other Meat Soup                  | 3    | 0   |
|                                     | Seafood Condensed Soup                     | 1    | 0   |
|                                     | Seafood Soup                               | 1    | 0   |
|                                     | Tomato Bisque                              | 5    | 0   |
|                                     | Tomato Condensed Soup                      | 33   | 2   |
|                                     | Tomato Soup                                | 12   | 5   |
|                                     | Vegetable Condensed Soup                   | 13   | 0   |
|                                     | Vegetable Soup                             | 17   | 5   |
|                                     | Total                                      | 1650 | 335 |
| <b>Sour Cream</b>                   | Fat Free Sour Cream                        | 7    | 0   |
|                                     | Flavored Sour Cream                        | 9    | 0   |
|                                     | Light Sour Cream                           | 32   | 0   |
|                                     | Reduced Fat Sour Cream                     | 2    | 1   |
|                                     | Sour Cream                                 | 106  | 11  |
|                                     | Sour Cream, Non-Dairy Imitation            | 6    | 2   |
|                                     | Total                                      | 162  | 14  |
| <b>Stuffings</b>                    | Stuffing                                   | 29   | 1   |
|                                     | Stuffing Mixes                             | 45   | 2   |
|                                     | Total                                      | 74   | 3   |
| <b>Tofu &amp; Meat Alternatives</b> | Frozen Tofu                                | 0    | 1   |
|                                     | Frozen Vegetables - Spinach                | 4    | 1   |
|                                     | Frozen Vegetarian Bacon                    | 3    | 0   |
|                                     | Frozen Vegetarian Breakfast Sausages       | 16   | 3   |
|                                     | Frozen Vegetarian Chicken Items            | 52   | 0   |
|                                     | Frozen Vegetarian Deli Meats               | 2    | 0   |
|                                     | Frozen Vegetarian Meatballs                | 15   | 0   |
|                                     | Frozen Vegetarian Sausages, Brats & Franks | 7    | 0   |
|                                     | Frozen Vegetarian Seafood Items            | 7    | 0   |
|                                     | Imitation Crab                             | 29   | 0   |
|                                     | Other Vegetarian Meat Options              | 70   | 6   |
|                                     | Soy & Veggie Patties and Burgers           | 118  | 23  |
|                                     | Tofu (All Types)                           | 13   | 34  |
|                                     | Vegetarian Bacon                           | 2    | 0   |
|                                     | Vegetarian Breakfast Sausages              | 12   | 0   |
|                                     | Vegetarian Burgers                         | 25   | 4   |
|                                     | Vegetarian Chicken Items                   | 5    | 0   |
|                                     | Vegetarian Deli Meats                      | 18   | 0   |
|                                     | Vegetarian Meatballs                       | 7    | 0   |

|                                   |                                     |      |     |
|-----------------------------------|-------------------------------------|------|-----|
|                                   | Vegetarian Sausages, Brats & Franks | 31   | 0   |
|                                   | Vegetarian Seafood Items            | 5    | 0   |
|                                   | Total                               | 441  | 72  |
| <b>Yogurt &amp; Yogurt Drinks</b> | Classic Fat Free Yogurt             | 149  | 12  |
|                                   | Classic Low Fat Yogurt              | 255  | 21  |
|                                   | Classic Yogurt                      | 174  | 72  |
|                                   | Greek Fat Free Yogurt               | 188  | 9   |
|                                   | Greek Low Fat Yogurt                | 101  | 4   |
|                                   | Greek Yogurts                       | 93   | 30  |
|                                   | Non-Dairy Almond Yogurts            | 44   | 4   |
|                                   | Non-Dairy Coconut Yogurt            | 52   | 9   |
|                                   | Non-Dairy Soy Yogurts               | 6    | 0   |
|                                   | Other Non-Dairy Yogurt              | 49   | 13  |
|                                   | Other Yogurts                       | 24   | 7   |
|                                   | Tube Yogurts                        | 32   | 22  |
|                                   | Yogurt - Kefir                      | 72   | 76  |
|                                   | Yogurt Drinks                       | 77   | 5   |
|                                   | Yogurt Parfait                      | 16   | 0   |
|                                   | Yogurt with Cereal                  | 8    | 2   |
|                                   | Yogurt-based Smoothie               | 72   | 23  |
|                                   | Yogurts with Fruit                  | 115  | 9   |
|                                   | Yogurts With Other Toppings         | 94   | 3   |
|                                   | Total                               | 1621 | 321 |
